# Supplementary material for: Antibiotic-induced release of small extracellular vesicles (exosomes) with surface-associated DNA
Source: PubMed Central journal article supplement (PMC5557920; doi:10.1038/s41598-017-08392-1), 2017-08-15
Supplement: 41598_2017_8392_MOESM1_ESM.pdf [file 41598_2017_8392_MOESM1_ESM.pdf]

## SUPPLEMENTARY INFORMATION

### **Antibiotic-induced release of small extracellular vesicles (exosomes) with surface-associated DNA**

Andrea Németh<sup>1</sup>, Norbert Orgovan<sup>2</sup>, Barbara W Sódar<sup>1</sup>, Xabier Osteikoetxea<sup>1</sup>, Krisztina Pálóczi<sup>1</sup>, Katalin É Szabó-Taylor<sup>1</sup>, Krisztina V Vukman<sup>1</sup>, Ágnes Kittel<sup>3</sup>, Lilla Turiák<sup>4</sup>, Zoltán Wiener<sup>1</sup>, Sára Tóth<sup>1</sup>, László Drahos<sup>4</sup>,  
Károly Vékey<sup>4</sup>, Robert Horvath<sup>2</sup> and Edit I Buzás<sup>1\*</sup>

<sup>1</sup>Department of Genetics, Cell- and Immunobiology, Semmelweis University, Budapest, 1085, Hungary

<sup>2</sup>Institute of Technical Physics and Materials Science, Hungarian Academy of Sciences, Budapest, 1121, Hungary

<sup>3</sup>Institute of Experimental Medicine, Hungarian Academy of Sciences, Budapest, 1083, Hungary

<sup>4</sup>Research Centre for Natural Sciences, Hungarian Academy of Sciences, Budapest, 1117, Hungary

\* corresponding author:

Prof. Edit I Buzás

[edit.buzas@gmail.com](mailto:edit.buzas@gmail.com)

Tel: +36-1-2102929

Fax: +36-1-3036968

## Supplementary Figure S1.

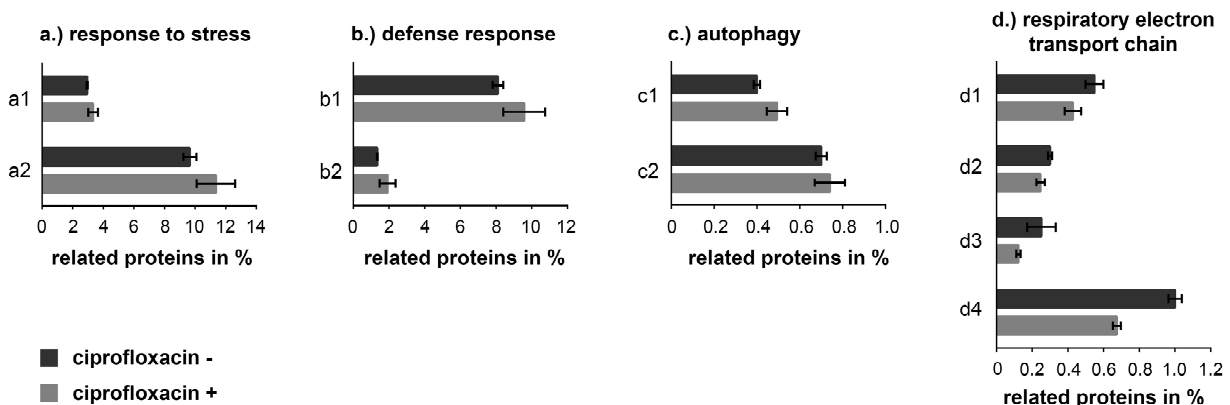

**Mass spectrometry analysis of biological processes in Jurkat cells cultured in the absence or sustained presence of ciprofloxacin. (a)** Response to stress-, **(b)** defense response-, **(c)** autophagy and **(d)** respiratory electron transport chain-related biological processes of Jurkat cells. Proteins related to the NCBI biological process annotations according to the Scaffold\_4.5.1 software. a1: oxidative stress, a2: defense response, b1: innate immune response, b2: inflammatory response, c1: mitochondrion degradation, c2: macroautophagy, d1: mitochondrial electron transport (ubiquitinol to cytochrome c), d2: mitochondrial electron transport (cytochrome c to oxygen), d3: mitochondrial electron transport (NADH to ubiquinone), d4: ATP synthesis coupled electron transport. Data are represented as the mean  $\pm$  S.D. (error bars) of two independent experiments.

## Supplementary Figure S2.

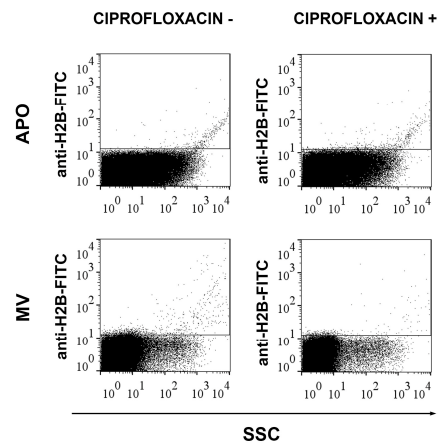

**Anti-histone H2B staining of Jurkat cell-derived apoptotic bodies (APOs) and microvesicles (MVs) by flow cytometry.** Dot plots show anti-H2B-FITC staining of APOs and MVs derived from Jurkat cells cultured in the absence (-) or presence (+) ciprofloxacin. Black lines indicate the background of anti-H2B-FITC antibody staining in annexin binding buffer.

## Supplementary Figure S3.

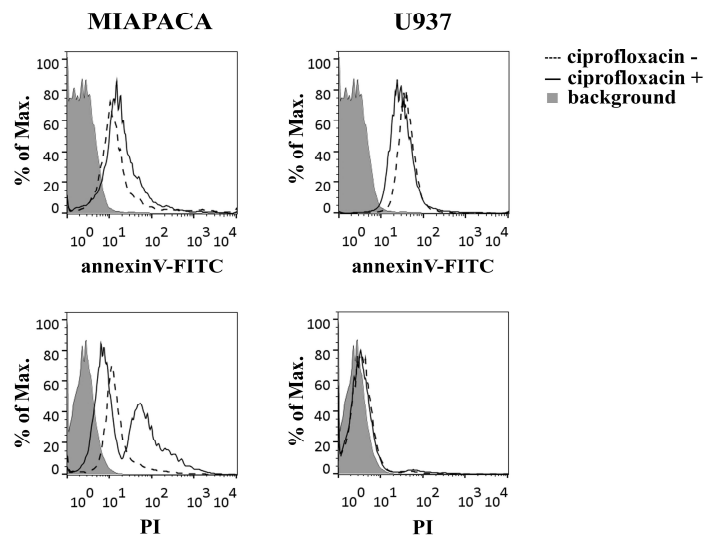

**Effect of sustained exposure of MiaPaCa and U937 cells to ciprofloxacin on the composition of the secreted EVs.** Exosomes (EXOs)-derived from ciprofloxacin-exposed/unexposed MiaPaCa and U937 cells were conjugated onto latex beads and characterized by flow cytometry after staining with annexinV-FITC and propidium iodide (PI).

The background fluorescence of stained latex beads is indicated by grey histograms. Histograms are representative of two independent experiments.

#### Supplementary Figure S4.

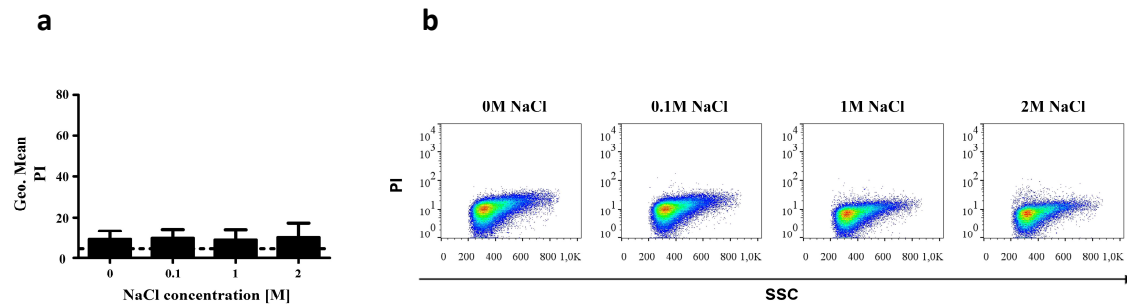

**Flow cytometry analysis of latex-bound Jurkat DNA after washing with high salt concentration buffers. (a)** Geometric mean values of propidium iodide (PI) fluorescent intensities of latex bead-bound DNA as a function of NaCl washing buffer concentration. Dashed line indicates the PI background of latex-beads without attached DNA. All data are presented as the mean +/- S.D. (error bars) of 3 independent experiments. **(b)** Density plots of PI fluorescent intensity of latex bead-bound DNA as a function of side scatter (SSC) parameter.

### Supplementary Figure S5.

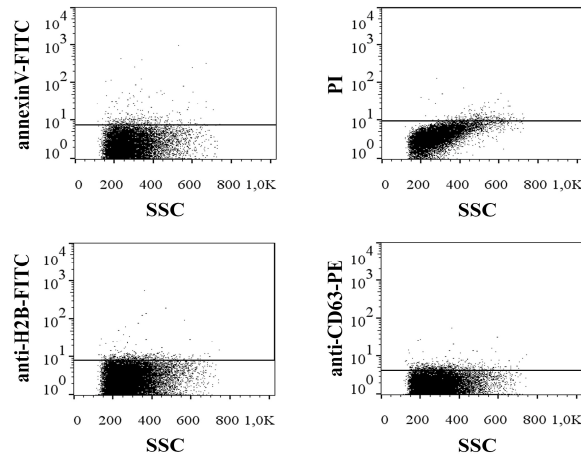

**Flow cytometry of labeled latex beads without attached EXOs.** Latex beads were labeled with annexinV-FITC, propidium-iodide (PI), anti-H2B-FITC and anti-CD63-PE in order to determine the background of the stainings. Fluorescence intensities are shown as a function of the side scatter (SSC) parameter. Black lines indicate the threshold for positive events.

### Supplementary Figure S6.

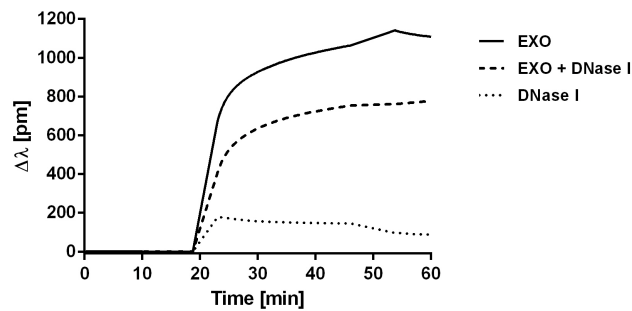

**Contribution of DNase I to the adsorption of DNase I-digested exosomes (EXOs).** Adsorption curves of undigested EXOs, EXOs digested with DNase I and DNase I only (as a control) represented by continuous, dashed and dotted lines, respectively. After PBS equilibration (20 min), adsorption of DNase I-undigested and digested EXOs as well as DNase I onto bare well Nb<sub>2</sub>O<sub>5</sub> surfaces was recorded by measuring the resonance wavelength shift ( $\Delta\lambda$ ) in time.

### Supplementary Figure S7.

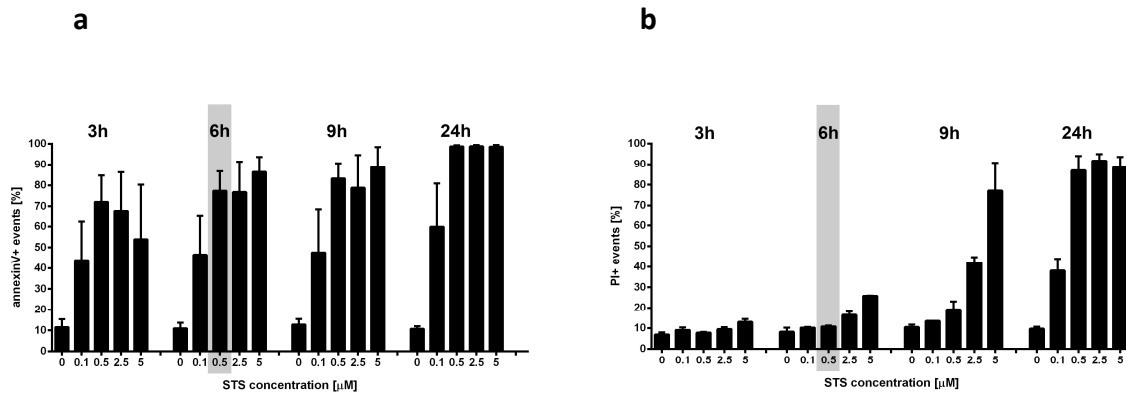

**Flow cytometry analysis of the viability of ciprofloxacin-exposed apoptotic Jurkat cells. (a)** AnnexinV-FITC and **(b)** propidium iodide (PI) positive events are indicated as a function of staurosporine (STS) concentration and incubation time. Apoptosis was induced in Jurkat cells with different STS concentrations (0.1 μM, 0.5 μM, 2.5 μM and 5 μM) for different periods of time (3h, 6h, 9h and 24h). For further experiments we selected to use 0.5 μM STS for 6 hours (highlighted by grey rectangles) which resulted in a robust increase in annexinV positivity with low PI positive events. All data are presented as the mean +/- S.D. (error bars) of 3 independent experiments.

### Supplementary Figure S8.

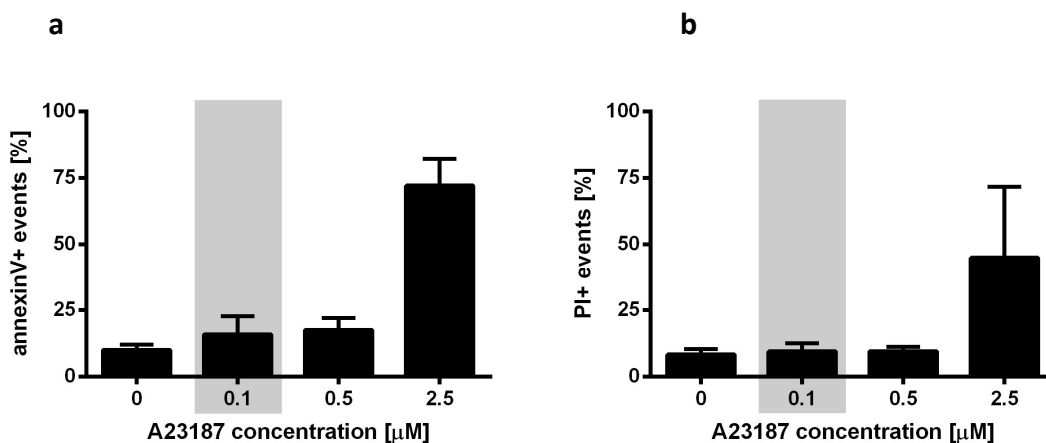

**Flow cytometry analysis of the viability of ciprofloxacin-exposed activated Jurkat cells. (a)** AnnexinV-FITC and **(b)** propidium iodide (PI) positive events are indicated as a function of Ca<sup>2+</sup> ionophore A23187 concentration in the presence of 20 ng/ml phorbol 12-myristate 13-acetate after 6 hours incubation. The grey rectangles highlight the results for the selected

0.1  $\mu\text{M}$  A23187 concentration. All data are presented as the mean  $\pm$  S.D. (error bars) of 3 independent experiments.

**Supplementary Figure S9.**

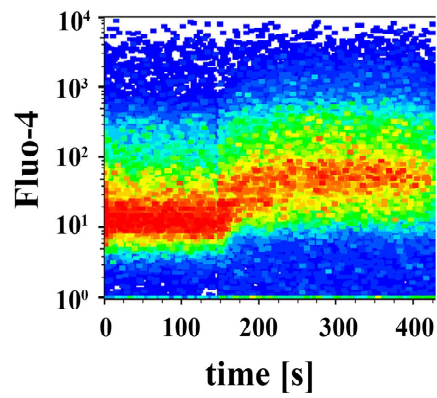

**Flow cytometry analysis of  $\text{Ca}^{2+}$  influx of activated Jurkat cells.** Fluo-4 fluorescent intensity of Jurkat cells was recorded as a function of time. After baseline measurement (150 sec), addition of 0.1  $\mu\text{M}$   $\text{Ca}^{2+}$  ionophore A23187 resulted in an increase in Fluo-4 signal.

**Supplementary Figure S10.**

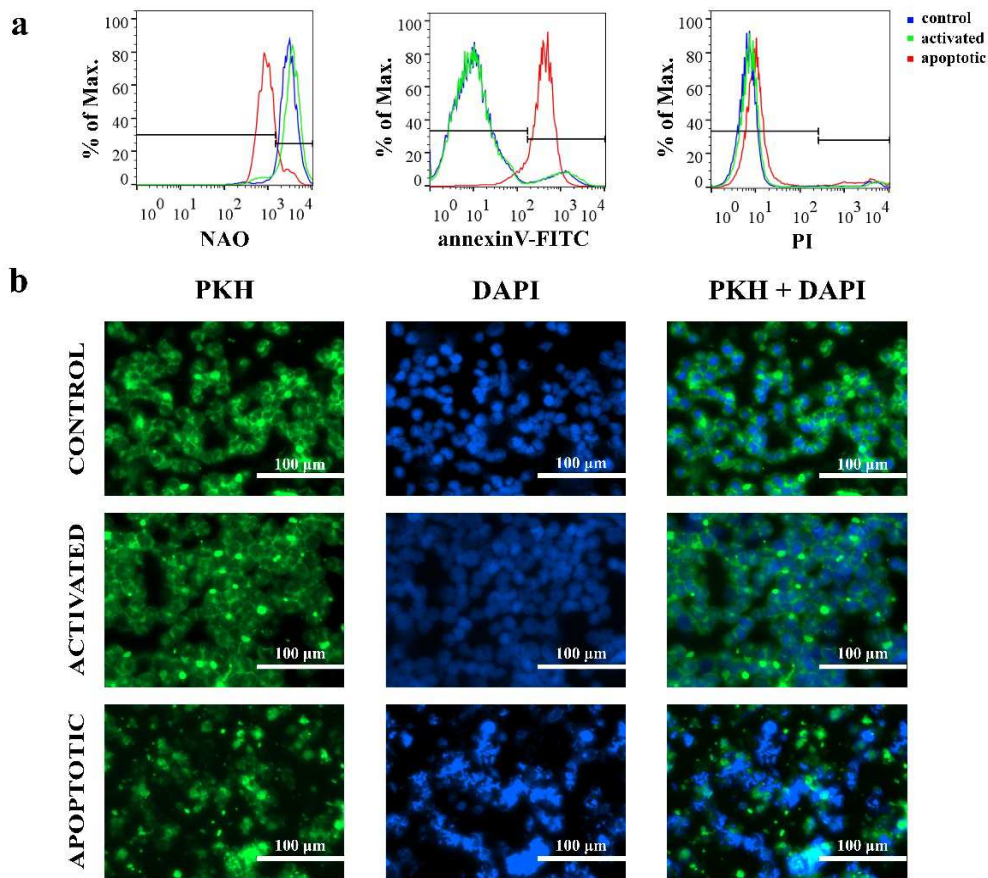

**Analysis of ciprofloxacin-exposed control, activated and apoptotic Jurkat cells by flow cytometry and fluorescent microscopy.** Activation and apoptosis of Jurkat cells were induced for 6 hours by 0.1  $\mu$ M A23187 + 20 ng/ml PMA and by 0.5  $\mu$ M STS, respectively. **(a)** Representative histogram plots of control, activated and apoptotic Jurkat cells analyzed after staining with the cardiolipin-binding dye, nonyl acridin orange (NAO), annexinV-FITC and propidium iodide (PI) for flow cytometry. **(b)** Fluorescent microscopy images of control, activated and apoptotic Jurkat cells after PKH and/or DAPI staining. Activation caused the enlargement of Jurkat cells, which was confirmed by membrane staining with PKH dye. Moreover, DAPI-stained slides show enlarged nuclei of activated cells as compared to control or apoptotic Jurkat cells. Apoptosis resulted in the formation of large apoptotic bodies.



**Supplementary Figure S11.**

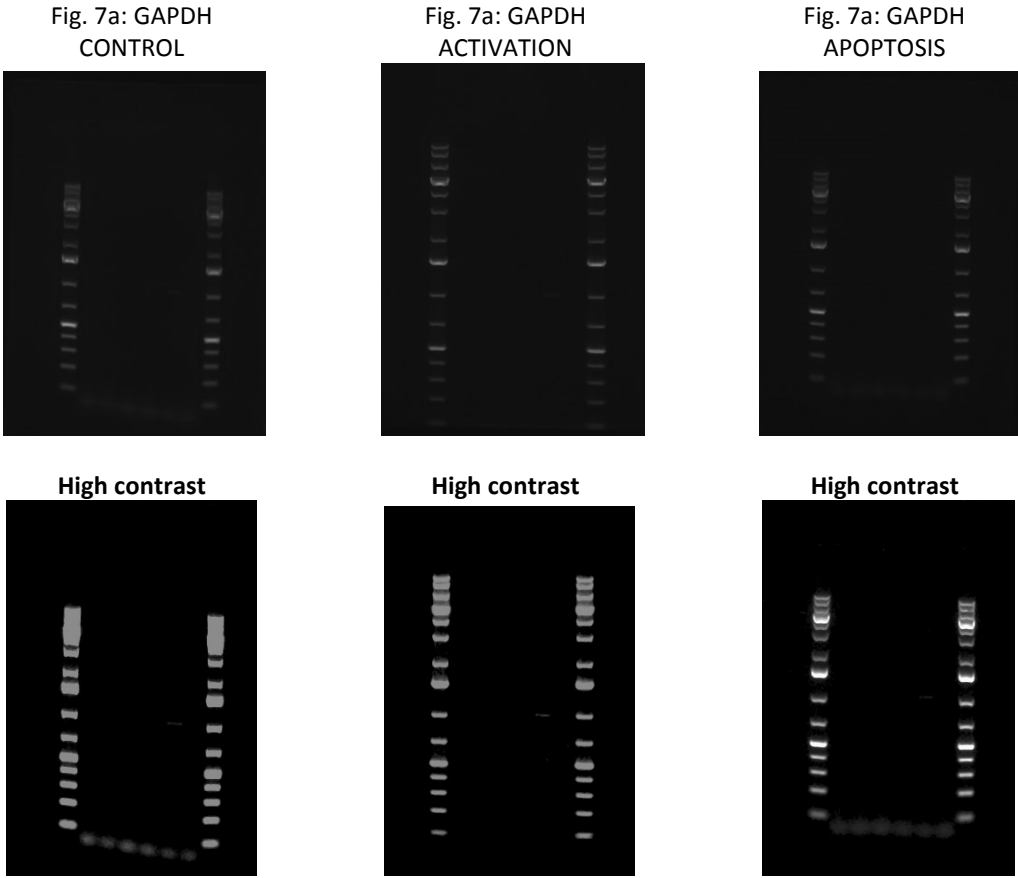

**Full-length and high-contrast gel images corresponding to Figure 7a (genomical GAPDH DNA sequence).**

**Supplementary Figure S12.**

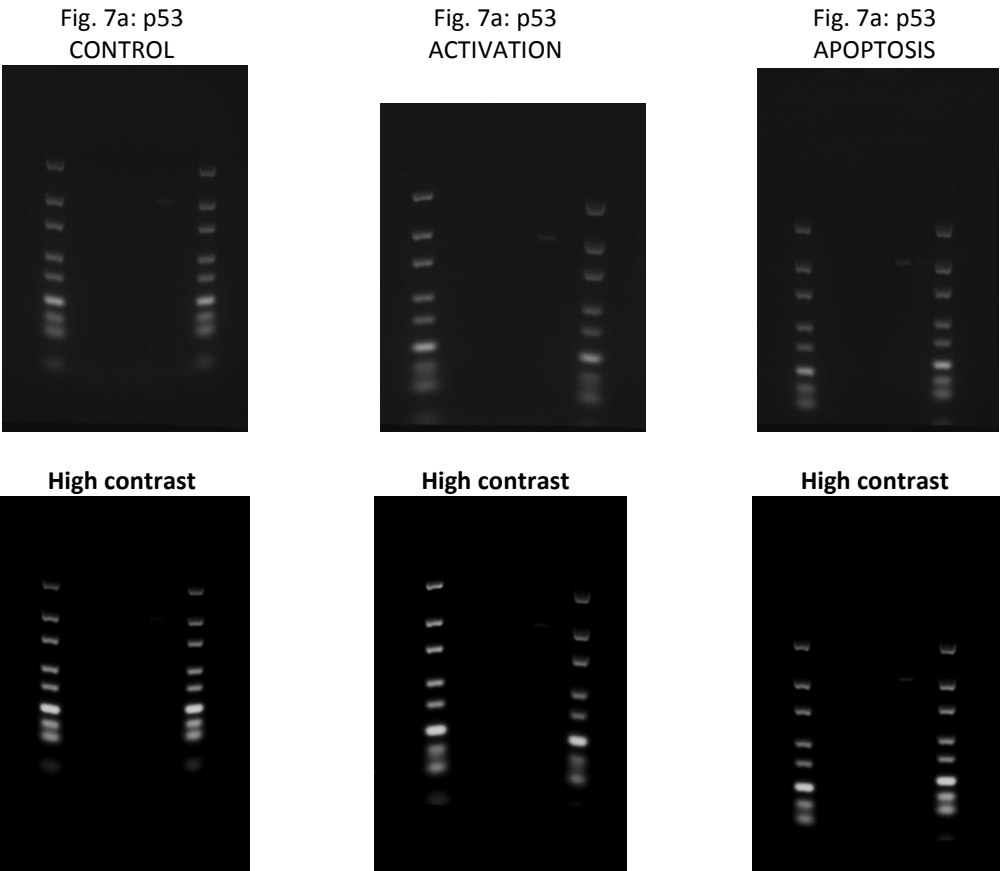

**Full-length and high-contrast gel images corresponding to Figure 7a (genomical p53 DNA sequence).**

**Supplementary Figure S13.**

Fig. 7b: mt control region  
CONTROL

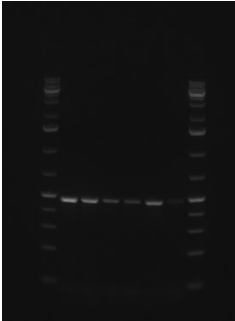

Fig. 7b: mt control region  
ACTIVATION

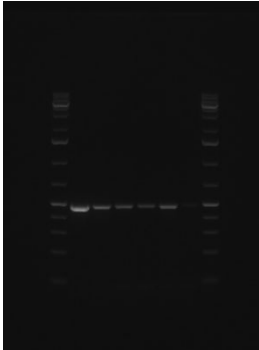

Fig. 7b: mt control region  
APOPTOSIS

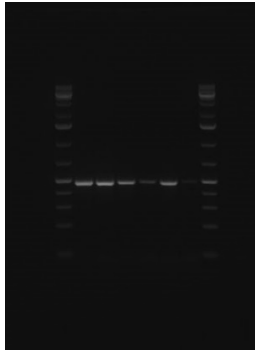

Fig. 7b: mt RNR1  
CONTROL

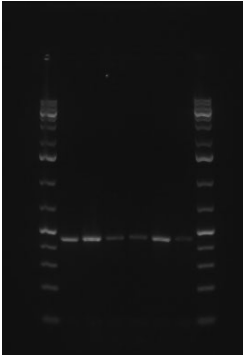

Fig. 7b: mt RNR1  
ACTIVATION

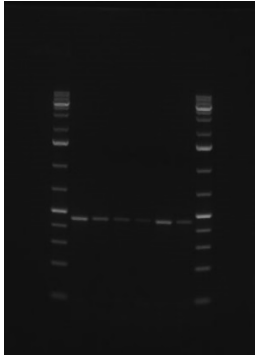

Fig. 7b: mt RNR1  
APOPTOSIS

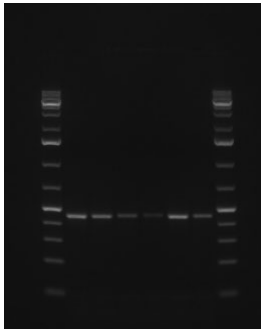

**Full-length gel images corresponding to Figure 7b (mt control region and RNR1 DNA sequences).**

**Supplementary Figure S14.**

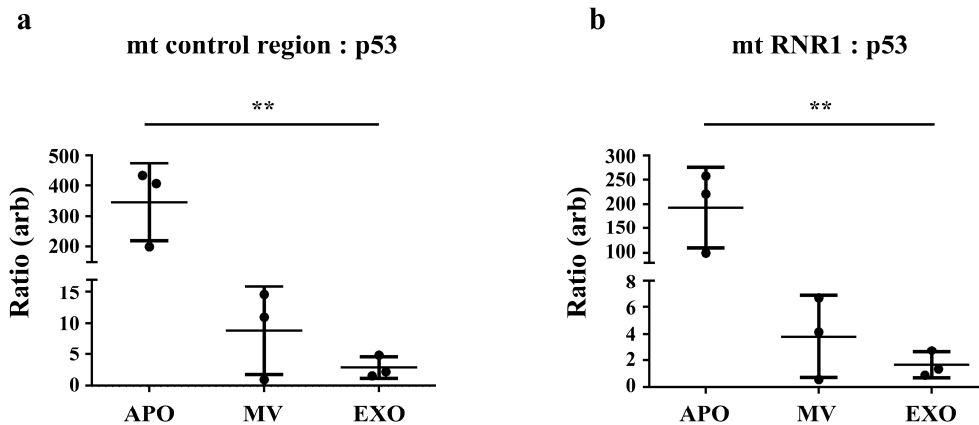

**Real time quantitative PCR analysis of ciprofloxacin-exposed Jurkat cell derived apoptotic bodies (APOs), microvesicles (MVs) and exosomes (EXOs).** The ratio of target **(a)** mt control region as well as **(b)** mt RNR1 DNA sequence to the reference p53 genomic DNA sequence were calculated. The calculation was based on the real-time PCR amplification efficiencies of target and reference DNA sequences and  $C_t$  values.  $C_t$  values were determined above a manually obtained threshold at constant fluorescence level. Data are shown as the mean +/- S.D. (error bars) of three independent experiments (\*\* $p < 0.01$ , One-way ANOVA). mt: mitochondrial; RNR1: mitochondrially encoded 12S RNA.

### Supplementary Table S1.

| Fractions | Density (g/mL) |
|-----------|----------------|
| 1-2       | 1.0345         |
| 3         | 1.0449         |
| 4         | 1.0514         |
| 5         | 1.0568         |
| 6         | 1.0719         |
| 7         | 1.0889         |
| 8         | 1.1403         |
| 9         | 1.1946         |

Densities of Optiprep™ density gradient fractions, containing exosomes highlighted with grey color. Fractions are numbered starting from the top of the gradient.

### Supplementary Table S2.

| Gene                           |         | Sequence 5'-3'             | Annealing temperature | Amplicon size (bp) | References                           |
|--------------------------------|---------|----------------------------|-----------------------|--------------------|--------------------------------------|
| GAPDH                          | Forward | TGAAGGTCGGAGTCAACGGATTTGGT | 65°C                  | 982                | [65] Zhang <i>Et al.</i> , 2007      |
|                                | Reverse | CATGTGGGCCATGAGGTCCACCAC   |                       |                    |                                      |
| p53 exon 8                     | Forward | TCTTGCTTCTCTTTCTAT         | 56°C                  | 188                | [62] Hoshida <i>Et al.</i> , 2003    |
|                                | Reverse | CGCTTCTTGCTGCTTGCT         |                       |                    |                                      |
| Control region (mitochondrial) | Forward | TAACTCCACCATTAGCACC        | 58°C                  | 440                | [63] Kjellström <i>Et al.</i> , 2012 |
|                                | Reverse | GAGGATGGTGGTCAAGGGAC       |                       |                    |                                      |
| RNR1 (mitochondrial)           | Forward | CAACCTCACCACTCTTGCT        | 58°C                  | 470                | [64] Li <i>et al.</i> , 2015         |
|                                | Reverse | GTAAGGTGGAGTGGGTTTGG       |                       |                    |                                      |

Primers used for PCR analysis of nuclear and mitochondrial DNA of extracellular vesicles.
